# Supplementary material for: Biomonitoring of marine vertebrates in Monterey Bay using eDNA metabarcoding
Source: PLoS One. 2017 Apr 25;12(4):e0176343. doi: 10.1371/journal.pone.0176343 (PMC5404852; doi:10.1371/journal.pone.0176343)
Supplement: S6 Table — (XLSX) [file pone.0176343.s009.xlsx]

## Sheet: S6 Table
S6 Table. Complete Hierarchy for Taxa Found Using eDNA Metabarcoding Compared to What is Known to Occur in the MBNMS.
* Indicates species on "Checklist of Fishes Known to Occur in Monterey Bay National Marine Sanctuary" ** Indicates genus on "Checklist of Fishes Known to Occur in Monterey Bay National Marine Sanctuary" *** Indicates family on "Checklist of Fishes Known to Occur in Monterey Bay National Marine Sanctuary" ^ Indicates species on list of MBNMS Site Characterization Species List ^^^ Indicates family …
	Family (Common Name)
		Subfamily
			Tribe
				Genus
					Species
Elasmobranchs	Lamnidae (Mackerel Sharks)
				Carcharodon
					Carcharodon carcharias*
	Squalidae (Dogfish Sharks)
				Squalus
					Squalus suckleyi*
Teleosts	Engraulidae (Anchovy)
				Engraulis
					Engraulis mordax*
	Clupeidae (Herrings, Shads, Sardines)
				Clupea**
					Clupea harengus**
					Clupea pallasii*
				Sardinops**
					Sardinops melanostictus**
	Salmonidae (Salmon, Trout, Chars)
				Oncorhynchus
					Oncorhynchus kisutch*
	Microstomatidae (Pencilsmelts)
				Nansenia
					Nansenia sanrikuensis**
	Synodontidae (Lizardfishes)
		Synodontinae
				Synodus
					Synodus lucioceps*
	Myctophidae*** (Lanternfishes)
				Diaphus
					Diaphus theta*
				Lampanyctus
					Lampanyctus tenuiformis*
				Nannobrachium
					Nannobrachium fernae**
				Stenobrachius
					Stenobrachius leucopsarus*
				Symbolophorus
					Symbolophorus californiensis*
				Triphoturus
					Triphoturus mexicanus*
	Ophidiidae (Cusk-eels)
				Chilara
					Chilara taylori*
	Bythitidae (Brotulas)
				Brosmophycis
					Brosmophycis marginata*
	Embiotocidae*** (Surfperches)
				Brachyistius
					Brachyistius frenatus*
				Cymatogaster
					Cymatogaster aggregata*
				Embiotoca
					Embiotoca jacksoni*
					Embiotoca lateralis*
				Hyperprosopon
					Hyperprosopon anale*
				Rhacochilus
					Rhacochilus vacca**
	Gobiesocidae (Clingfishes)
				Gobiesox
					Gobiesox maeandricus*
	Scomberesocidae (Sauries)
				Cololabis
					Cololabis saira*
	Carangidae (Jacks, Pompanos, Mackerels)
				Decapterus
					Decapterus macrosoma**
				Seriola
					Seriola lalandi*
				Trachurus**
					Trachurus symmetricus*
	Paralichthyidae (Sand Flounders)
				Citharichthys
					Citharichthys sordidus*
					Citharichthys stigmaeus*
					Citharichthys xanthostigma*
				Etropus
					Etropus microstomus***
	Pleuronectidae*** (Righteye Flounders)
				Eopsetta
					Eopsetta jordani*
				Hippoglossus**
				Pleuronichthys
					Pleuronichthys decurrens*
	Syngnathidae (Seahorses, Pipefishes)
				Syngnathus
					Syngnathus leptorhynchus*
	Scombridae (Mackerels, Tunas, Bonitos)
		Scombrinae***
			Scombrini
				Scomber**
					Scomber australasicus**
					Scomber colias**
			Thunnini
				Euthynnus
					Euthynnus alletteratus**
				Thunnus**
	Tetragonuridae (Squaretails)
				Tetragonurus
					Tetragonurus cuvieri*
	Sebastidae*** (Rockfishes, Rock Perches)
		Sebastinae***
				Sebastes**
					Sebastes auriculatus*
					Sebastes babcocki*
					Sebastes diploproa*
					Sebastes entomelas*
					Sebastes koreanus**
					Sebastes mystinus*
					Sebastes oblongus**
					Sebastes paucispinis*
		Sebastolobinae
				Sebastolobus
					Sebastolobus macrochir**
	Stichaeidae (Pricklebacks)
		Lumpeninae
				Anisarchus
					Anisarchus medius***
		Opisthocentrinae***
				Askoldia
					Askoldia variegata***
				Plectobranchus
					Plectobranchus evides*
		Stichaeinae
				Stichaeopsis
					Stichaeopsis epallax***
	Cryptacanthodidae (Wrymouths)
				Cryptacanthodes
					Cryptacanthodes bergi
					Cryptacanthodes giganteus
	Pholidae (Gunnels)
				Apodichthys
					Apodichthys flavidus*
	Anarhichadidae (Wolffishes)
				Anarrhichthys
					Anarrhichthys ocellatus*
	Zaniolepididae (Combfishes)
				Zaniolepis**
	Hexagrammidae*** (Greenlings)
				Hexagrammos**
					Hexagrammos agrammus**
					Hexagrammos decagrammus*
					Hexagrammos otakii**
				Ophiodon
					Ophiodon elongatus*
				Oxylebius
					Oxylebius pictus*
	Cottidae (Sculpins)
				Hemilepidotus**
					Hemilepidotus spinosus*
				Leptocottus
					Leptocottus armatus*
				Scorpaenichthys
					Scorpaenichthys marmoratus*
	Sciaenidae (Drums)
				Genyonemus
					Genyonemus lineatus*
	Molidae (Ocean Sunfishes)
				Mola
					Mola mola*
Mammals	Phocidae (Earless Seals)
				Mirounga
					Mirounga angustirostris^
				Phoca
					Phoca vitulina^
	Otariidae^^^ (Eared Seals)
				Eumetopias
					Eumetopias jubatus^
				Zalophus
					Zalophus californianus^
	Balaenopteridae (Rorquals)
				Megaptera
					Megaptera novaeangliae^
	Delphinidae^^^ (Oceanic Dolphins)
				Grampus
					Grampus griseus^
